# Supplementary material
Source: publisher figshare collection journal article supplement (https://frontiersin.figshare.com/ndownloader/files/13290347)
Supplement: Supplementary file [file 13290347]

| Antibody                                              | clone   | company  | reported cross reactivity |
|-------------------------------------------------------|---------|----------|---------------------------|
| Human KIR/CD158 PE-conjugated antibody                | #180704 | R&D      | 2DL2, 2DS2, 2DS4          |
| Human KIR2DL1/KIR2DS5 Fluorescein-conjugated antibody | #143211 | R&D      | 2DS5                      |
| Human KIR2DL3/CD158b2 APC-conjugated antibody         | #180701 | R&D      |                           |
| Human KIR2DL3/CD158b2 PE-conjugated antibody          | #180701 | R&D      |                           |
| Human CD158b2 (KIR2DL3) PE-conjugated antibody        | REA147  | Miltenyi | 2DL2                      |
